# Supplementary material for: Blocking endothelial apoptosis revascularizes the retina in a model of ischemic retinopathy
Source: JCI journal article supplement (doi:10.1172/jci127668), 2020-05-19
Supplement: sd1 [file 1]

301 Moved Permanently

# Moved Permanently

The document has moved here.
